# Supplementary material
Source: PubMed Central journal article supplement (PMC1413781)

## A. Arc Analogues

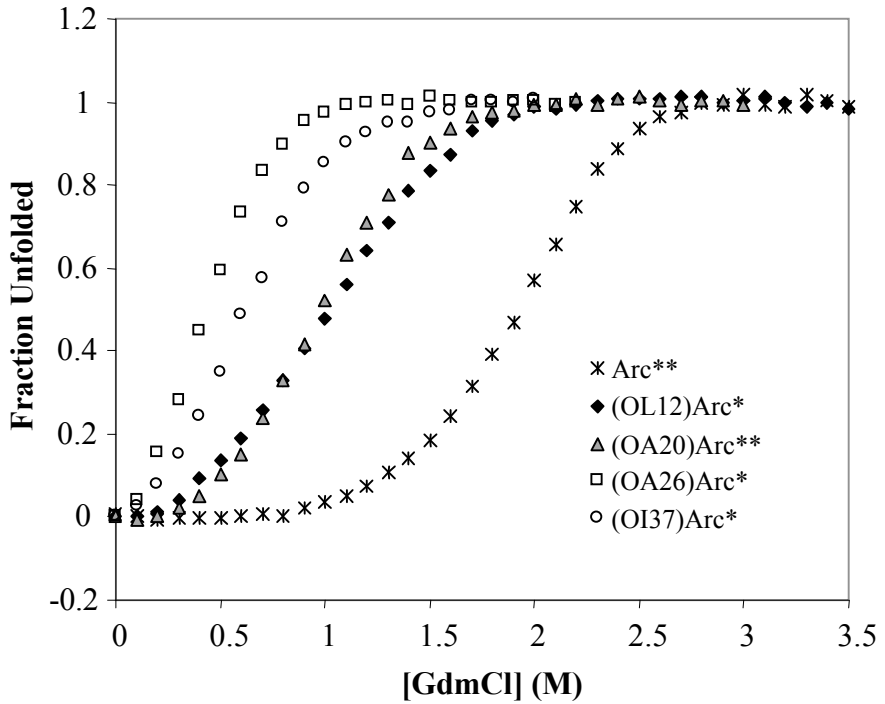

## B. CopG Analogues

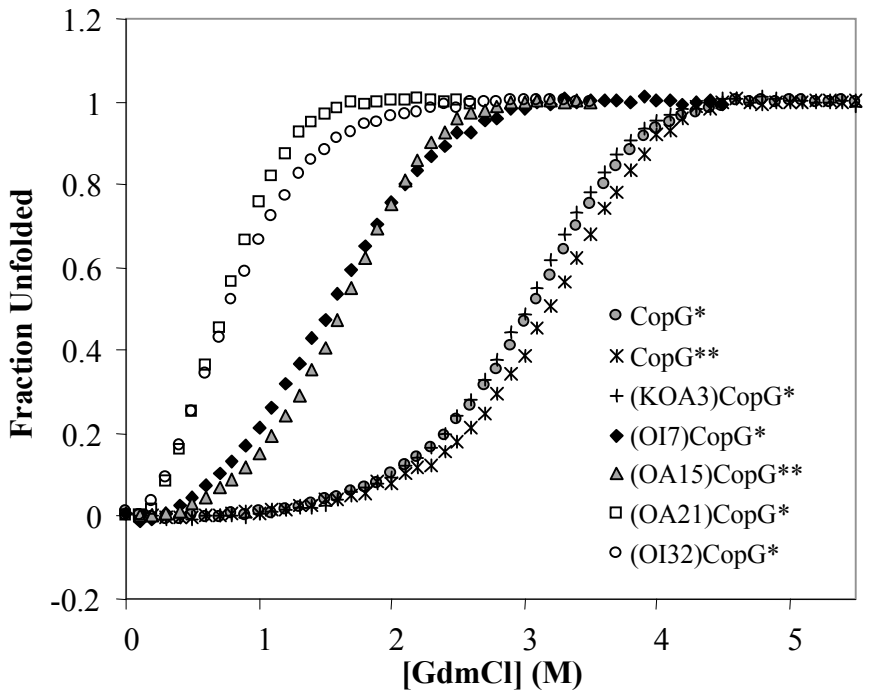

Supplement: pnas_0508121103_1.pdf [file pnas_0508121103_1.pdf]

### A. (OV41)Arc\*

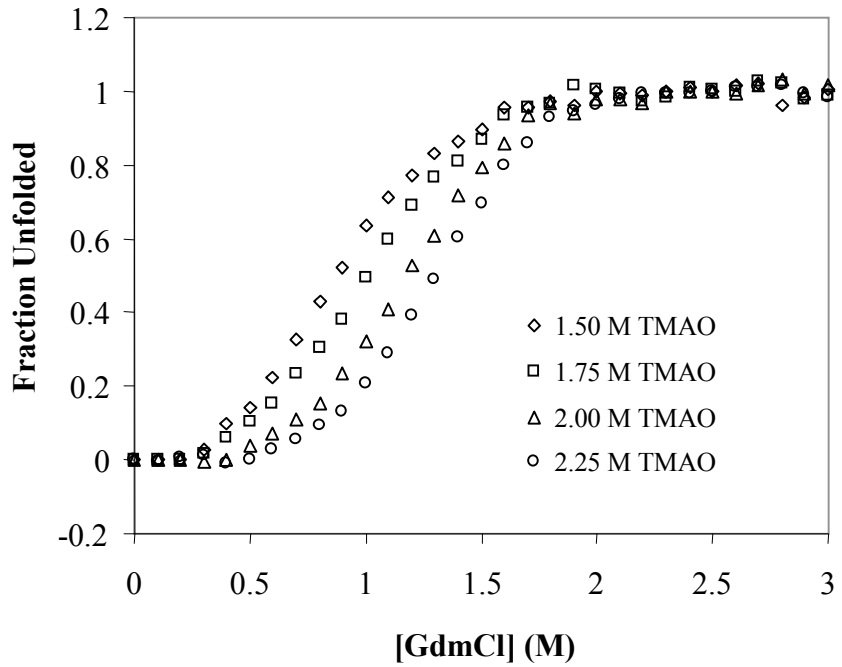

### B. (OL36)CopG\*

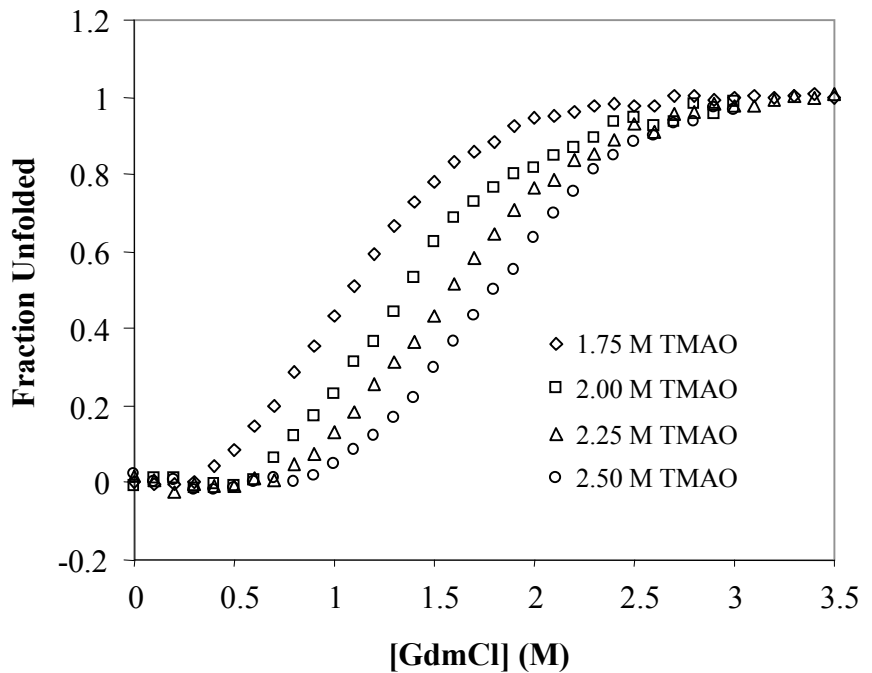

Supplement: pnas_0508121103_2.pdf [file pnas_0508121103_2.pdf]

**A. (OL12) Arc\***

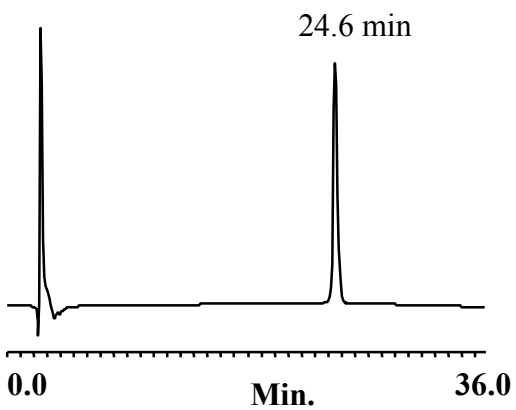

**B. (OA20) Arc\*\***

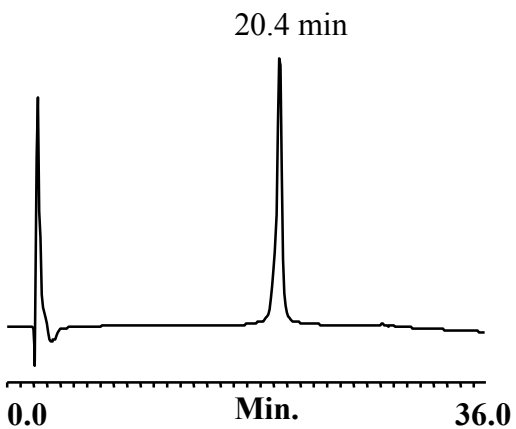

**C. (OA26) Arc\***

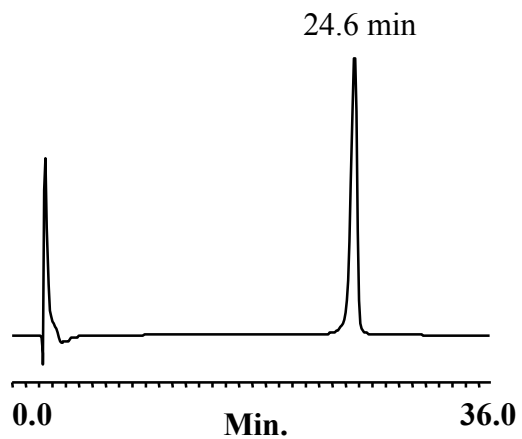

**D. (OI37) Arc\***

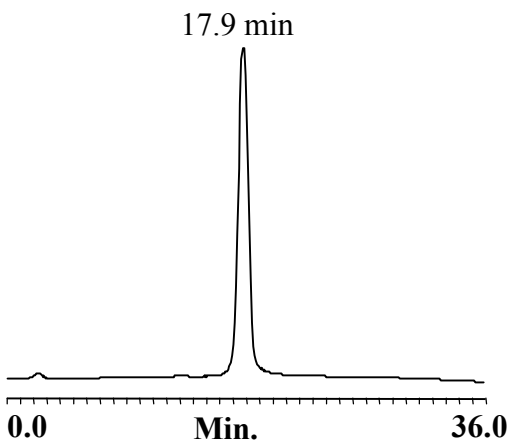

**E. (OV41) Arc\***

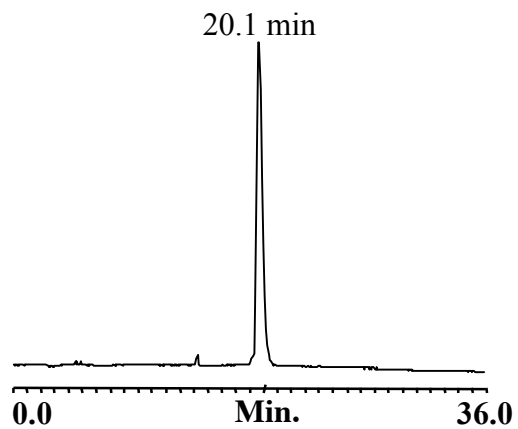

Supplement: pnas_0508121103_3.pdf [file pnas_0508121103_3.pdf]

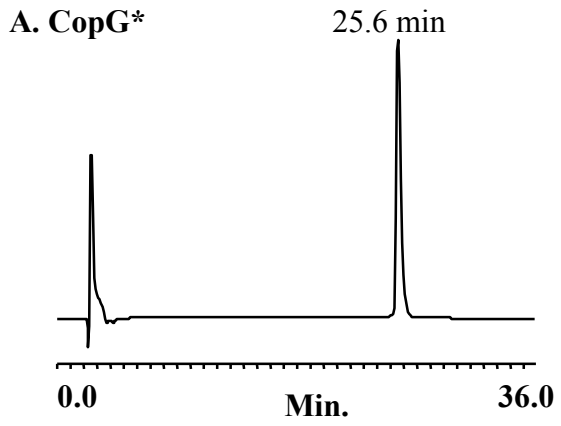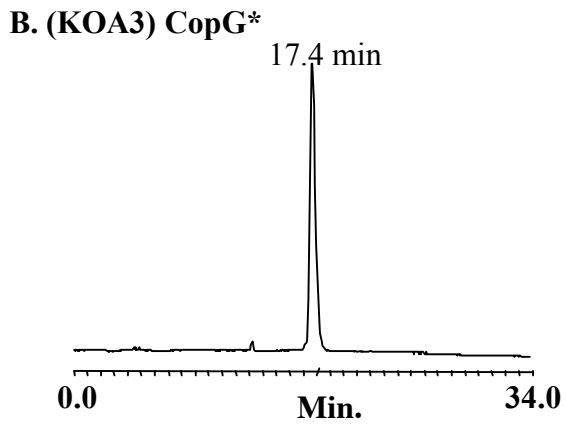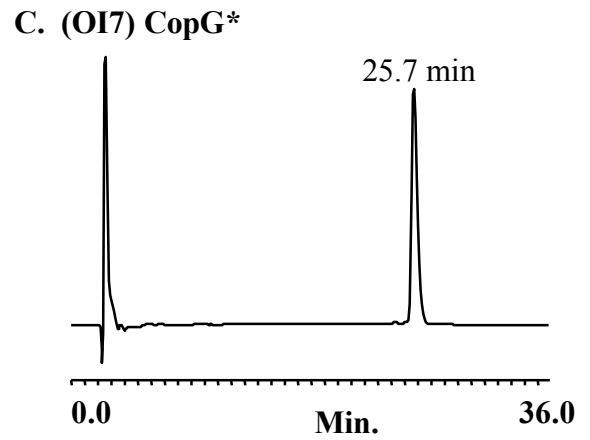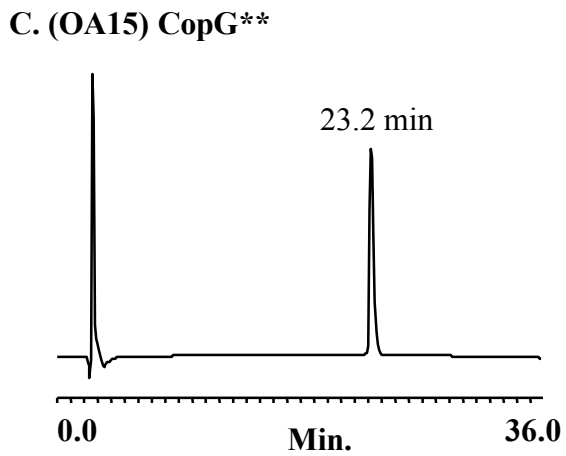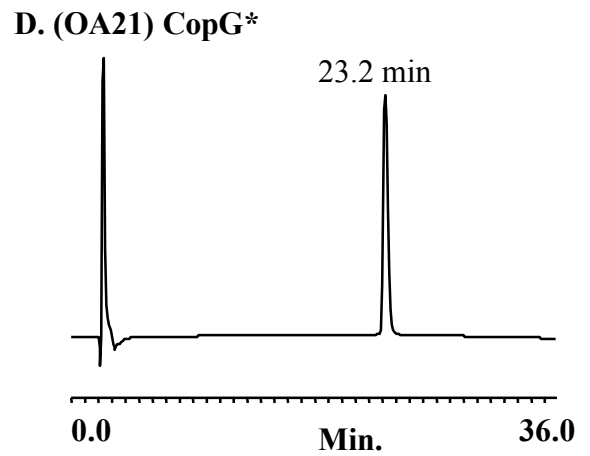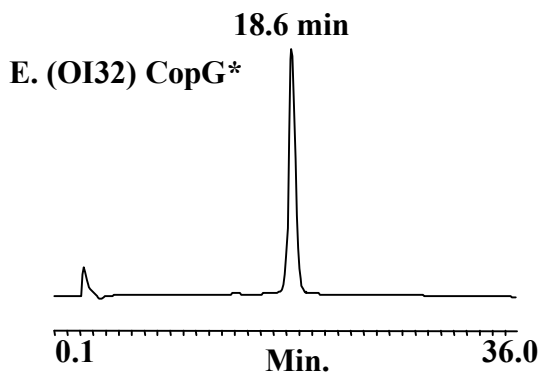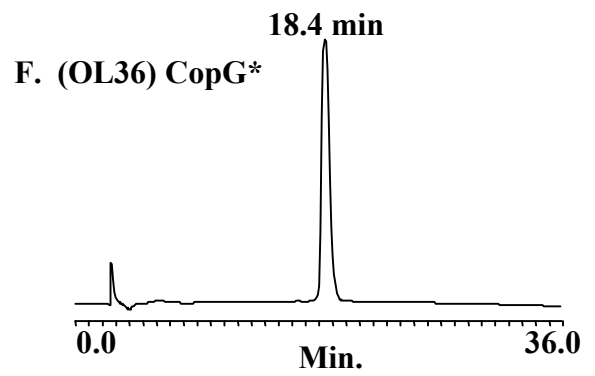

Supplement: pnas_0508121103_4.pdf [file pnas_0508121103_4.pdf]
